# Supplementary material
Source: PubMed Central journal article supplement (PMC5689073)

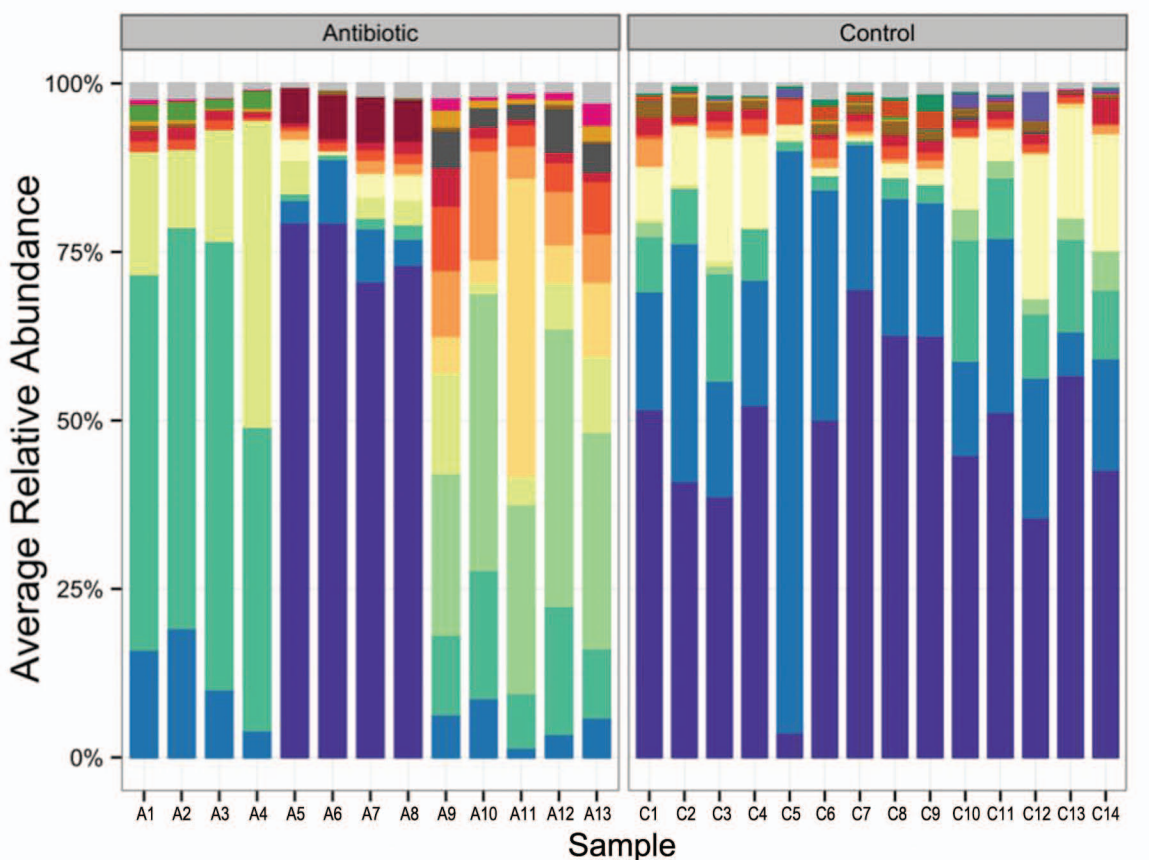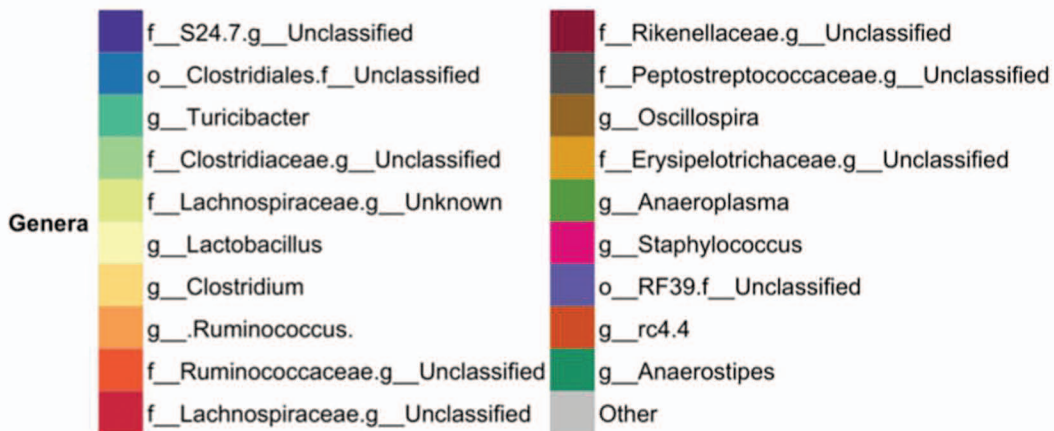

Supplement: NIHMS918970-supplement-SDC3.pdf [file NIHMS918970-supplement-SDC3.pdf]

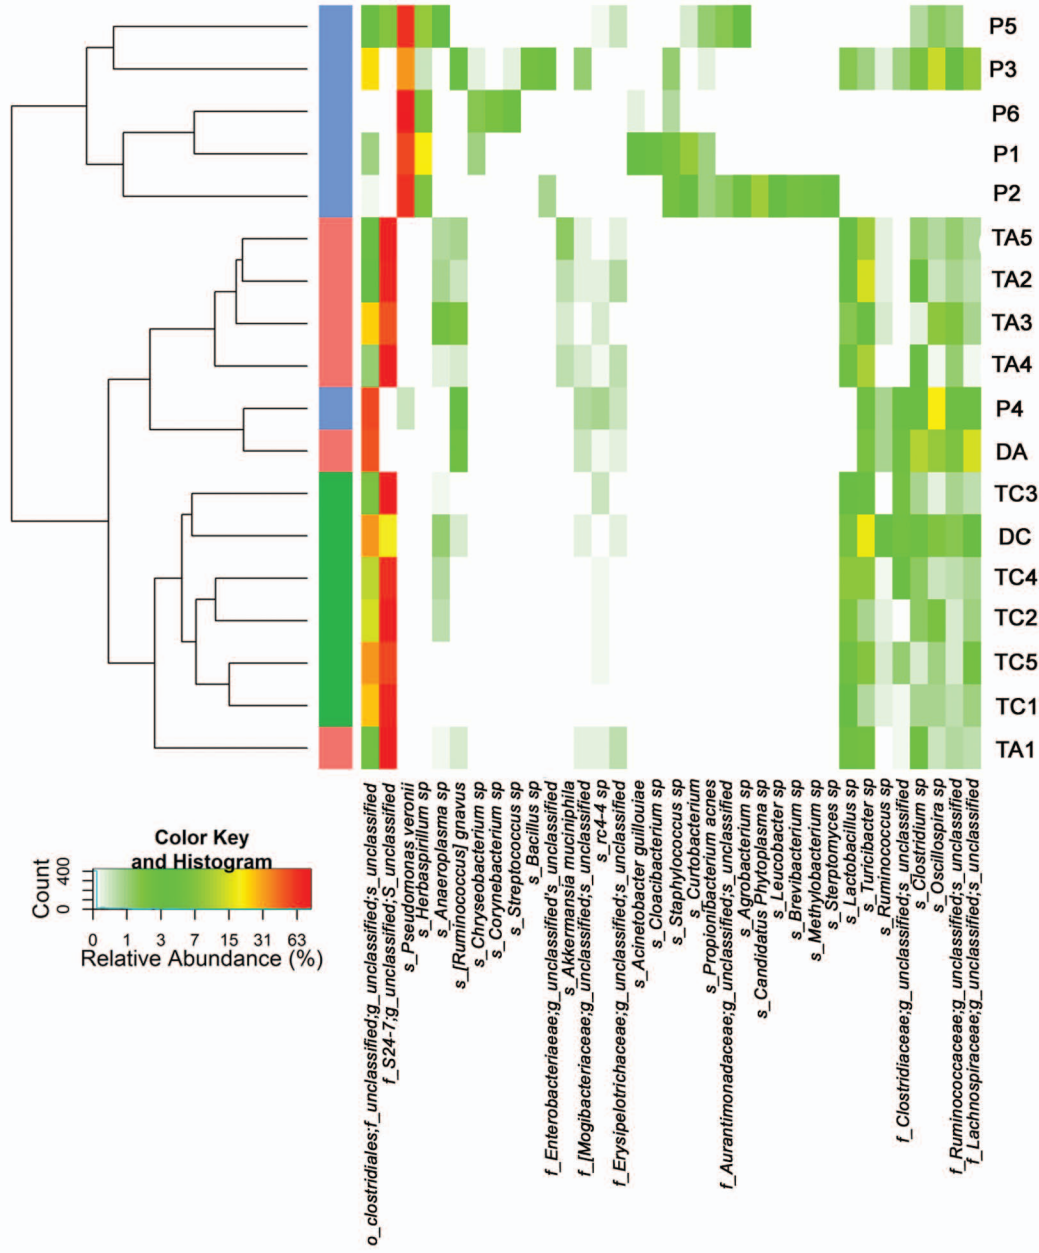

Supplement: NIHMS918970-supplement-SDC4.pdf [file NIHMS918970-supplement-SDC4.pdf]

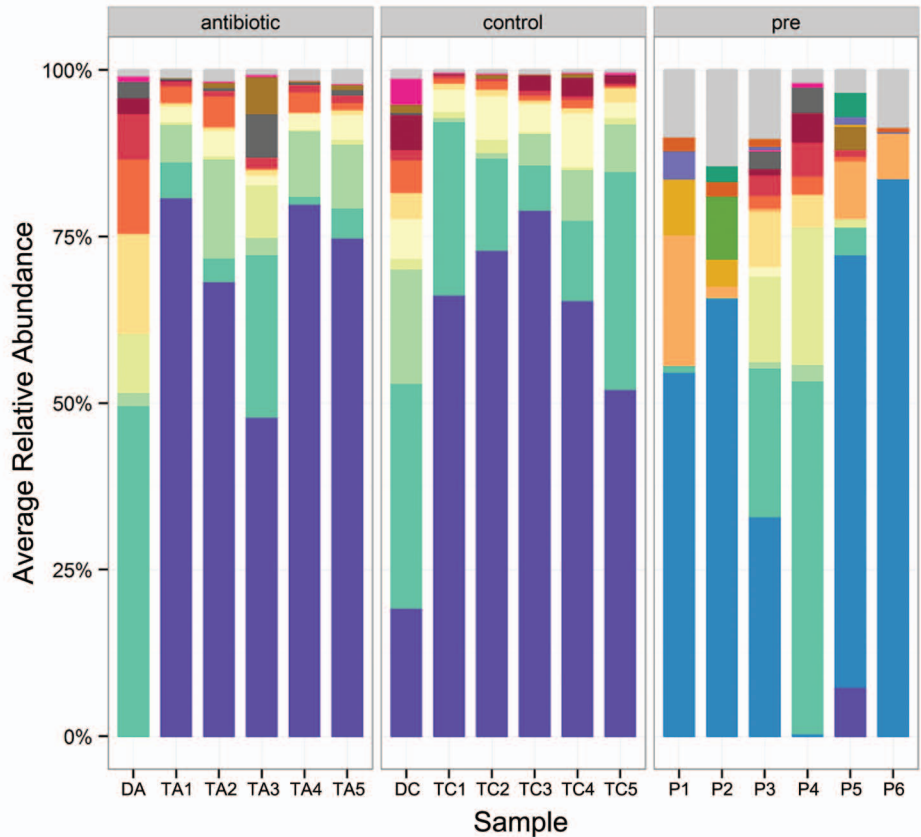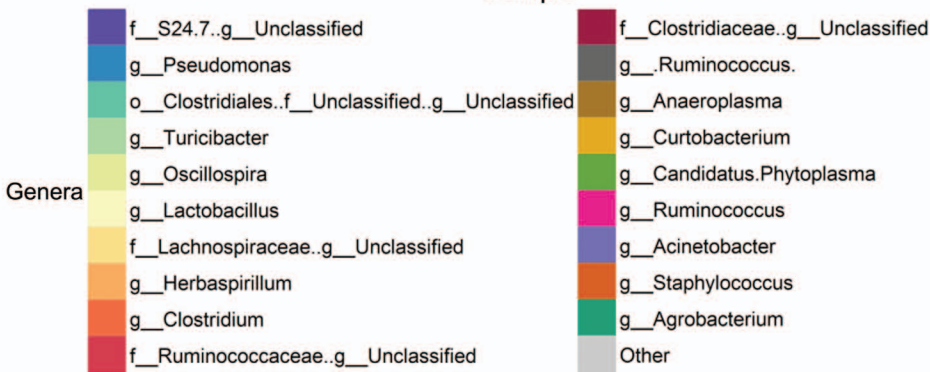

Supplement: NIHMS918970-supplement-SDC5.pdf [file NIHMS918970-supplement-SDC5.pdf]
